# Supplementary material for: The Effect of Annealing on the Structure and Electric Performance of Polypropylene Films
Source: Hindawi journal article supplement (doi:10.1155/2022/5970484), 2022-11-08
Supplement: f1 [file 5970484.f1.docx]

**Supporting information**

**The Effect of Annealing on the Structure and Electric Performance of Polypropylene films**

Xiying Dai,a Zhaoliang Xing,a* Wei Yang,a Chong Zhang,a Fei Li,a Xin Chen,a Chen Li,b Jianjun Zhou,b* Lin Lib

a *State Key Laboratory of Advanced Power Transmission Technology, Global Energy Interconnection Research Institute Co. Ltd. Beijing, 102209, China*

*b Beijing Key Laboratory of Energy Conversion and Storage Materials, College of Chemistry, Beijing Normal University, Beijing, 100875, China*


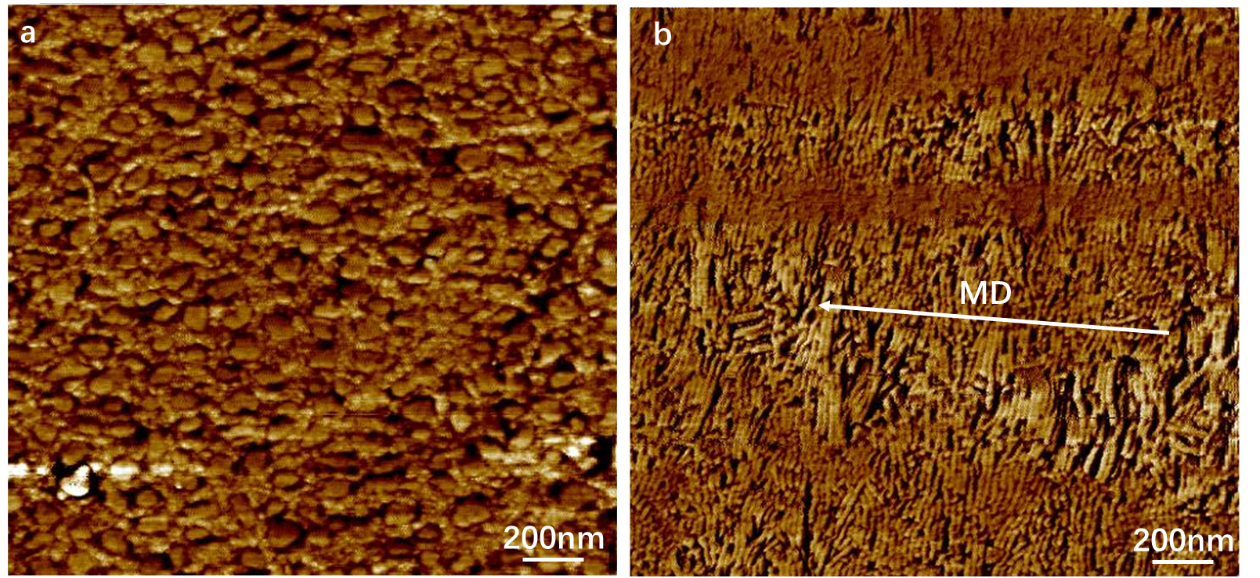


**Fig. S1** Morphology of initial (a) BOPP and (b) UOPP films obtained by atomic force microscopy.

Atomic force microscopy (AFM) studies were performed using an AFM (NanoScope V, Multimode V, Bruker). Si probes (TESP, Bruker) with a resonance frequency of approximately 300 kHz and a spring constant of about 40 Nm-1 were used.

**Fig. S2** The second DSC heating curves of BOPP and UOPP films.

**Fig. S3** Orientation degree plotted with *Eb* for (a) BOPP and (b) UOPP films.
